# Supplementary material for: Relative abundance of the Prevotella genus within the human gut microbiota of elderly volunteers determines the inter-individual responses to dietary supplementation with wheat bran arabinoxylan-oligosaccharides
Source: PubMed Central journal article supplement (PMC7490872; doi:10.1186/s12866-020-01968-4), 2020-09-14
Supplement: 12866_2020_1968_MOESM3_ESM.pdf [file 12866_2020_1968_MOESM3_ESM.pdf]

**Additional file 3: Table S3** Metastats analysis of the most proportionally abundant operational taxonomic units (OTUs; those accounting for > 0.5 % of total proportional abundance between *Prevotella*- plus group individual washout period and *Prevotella*- minus group individual washout period). P-values less than  $p < 0.001$  are shown in bold. P values were corrected using the Benjamini-Hochberg method (Benjamini, Hochberg 1995) to account for multiple comparisons.

| OTU     | <u>MegaBLAST Closest Match (Representative Seq.)</u> | No.of seq | Mean of <i>Prevotella</i> -plus group washout (%) | Mean of <i>Prevotella</i> -minus group washout (%) | p-value      | Significant after applying Benjamini-Hochberg correction |
|---------|------------------------------------------------------|-----------|---------------------------------------------------|----------------------------------------------------|--------------|----------------------------------------------------------|
| Otu0001 | <i>Bacteroides vulgatus</i> (99%)                    | 27146     | 3.80                                              | 5.66                                               | 0.075        | No                                                       |
| Otu0002 | <i>Prevotella copri</i>                              | 21446     | 8.15                                              | 0.03                                               | <b>0.001</b> | Yes                                                      |
| Otu0003 | <i>Bacteroides uniformis</i>                         | 20348     | 1.59                                              | 4.97                                               | <b>0.001</b> | Yes                                                      |
| Otu0004 | <i>Faecalibacterium prausnitzii</i> (99%)            | 18279     | 3.08                                              | 3.59                                               | 0.365        | No                                                       |
| Otu0005 | <i>Faecalibacterium prausnitzii</i>                  | 10941     | 1.87                                              | 1.86                                               | 0.972        | No                                                       |
| Otu0006 | <i>Ruminococcus bicirculans</i> (99%)                | 9984      | 1.63                                              | 1.79                                               | 0.778        | No                                                       |
| Otu0007 | <i>Guyana massiliensis</i>                           | 9460      | 0.54                                              | 2.01                                               | 0.011        | Yes                                                      |
| Otu0008 | <i>Faecalibacterium prausnitzii</i> (98%)            | 8876      | 1.16                                              | 1.75                                               | 0.086        | No                                                       |
| Otu0009 | <i>Bacteroides dorei</i>                             | 8472      | 1.16                                              | 1.90                                               | 0.146        | No                                                       |
| Otu0010 | <i>Faecalibacterium prausnitzii</i> (99%)            | 8456      | 1.30                                              | 1.33                                               | 0.939        | No                                                       |
| Otu0011 | <i>Bifidobacterium longum</i>                        | 8396      | 0.36                                              | 1.55                                               | <b>0.001</b> | Yes                                                      |
| Otu0012 | <i>Prevotella</i> spp.                               | 8221      | 2.99                                              | 0.01                                               | <b>0.001</b> | Yes                                                      |
| Otu0013 | <i>Escherichia coli</i>                              | 7427      | 3.64                                              | 0.07                                               | 0.143        | No                                                       |
| Otu0014 | <i>Bifidobacterium adolescentis</i>                  | 7359      | 0.44                                              | 1.16                                               | 0.012        | Yes                                                      |
| Otu0015 | <i>Anaerostipes hadrus</i>                           | 6716      | 0.58                                              | 1.47                                               | <b>0.001</b> | Yes                                                      |
| Otu0016 | <i>Barnesiella intestinihominis</i>                  | 6647      | 1.58                                              | 0.92                                               | 0.088        | No                                                       |
| Otu0017 | <i>Faecalibacterium prausnitzii</i>                  | 6603      | 1.03                                              | 1.21                                               | 0.415        | No                                                       |
| Otu0018 | Uncharacterised Ruminococcaceae                      | 6600      | 1.12                                              | 1.18                                               | 0.922        | No                                                       |
| Otu0019 | <i>Streptococcus salivarius</i>                      | 6261      | 0.27                                              | 1.65                                               | 0.002        | Yes                                                      |
| Otu0020 | <i>Bacteroides cellulosilyticus</i>                  | 6160      | 0.14                                              | 1.69                                               | <b>0.001</b> | Yes                                                      |
| Otu0021 | <i>Eubacterium rectale</i>                           | 6048      | 0.69                                              | 1.09                                               | 0.120        | No                                                       |
| Otu0022 | <i>Prevotella ruminicola</i>                         | 5974      | 2.05                                              | 0.00                                               | 0.043        | No                                                       |
| Otu0023 | <i>Subdoligranulum</i> sp. (97%)                     | 4820      | 0.42                                              | 1.19                                               | 0.006        | Yes                                                      |
| Otu0024 | Uncharacterised Rikenellaceae                        | 4808      | 0.01                                              | 1.18                                               | 0.054        | No                                                       |
| Otu0025 | <i>Collinsella aerofaciens</i>                       | 4242      | 0.71                                              | 0.73                                               | 0.941        | No                                                       |
| Otu0026 | <i>Bacteroides massiliensis</i>                      | 4218      | 0.23                                              | 1.14                                               | 0.033        | No                                                       |
| Otu0027 | <i>Sutterella wadsworthensis</i>                     | 4097      | 0.46                                              | 0.95                                               | 0.189        | No                                                       |
| Otu0028 | <i>Alistipes putredinis</i>                          | 4079      | 0.83                                              | 0.72                                               | 0.308        | No                                                       |
| Otu0029 | <i>Bacteroides stercoris</i> (99%)                   | 3941      | 0.24                                              | 1.02                                               | 0.051        | No                                                       |
| Otu0030 | <i>Ruminococcus bromii</i> (99%)                     | 3844      | 0.88                                              | 0.70                                               | 0.544        | No                                                       |
| Otu0031 | <i>Bifidobacterium faecale/adolescentis</i>          | 3722      | 0.27                                              | 0.53                                               | 0.117        | No                                                       |
| Otu0032 | <i>Romboutsia timonensis</i> (99%)                   | 3437      | 0.74                                              | 0.57                                               | 0.335        | No                                                       |
| Otu0033 | Uncharacterised Alphaproteobacteria                  | 3385      | 0.57                                              | 0.91                                               | 0.782        | No                                                       |
| Otu0034 | <i>Collinsella aerofaciens</i>                       | 3261      | 0.28                                              | 0.72                                               | 0.041        | No                                                       |
| Otu0035 | <i>Roseburia faecis</i>                              | 3103      | 0.57                                              | 0.43                                               | 0.263        | No                                                       |
| Otu0036 | <i>Blautia</i> sp. (99%)                             | 3091      | 0.22                                              | 0.66                                               | <b>0.001</b> | Yes                                                      |
| Otu0037 | <i>Intestinibacter bartlettii</i> (98%)              | 3010      | 1.06                                              | 0.35                                               | <b>0.001</b> | Yes                                                      |
| Otu0038 | Uncharacterised Firmicutes                           | 2960      | 0.00                                              | 0.87                                               | <b>0.001</b> | Yes                                                      |
| Otu0039 | <i>Bacteroides eggerthii</i> (99%)                   | 2927      | 0.05                                              | 0.63                                               | 0.006        | Yes                                                      |
| Otu0040 | Uncharacterised Rikenellaceae                        | 2912      | 0.00                                              | 0.74                                               | 0.062        | No                                                       |
| Otu0041 | <i>Bifidobacterium pseudocatenulatum</i>             | 2874      | 0.06                                              | 0.51                                               | 0.056        | No                                                       |
| Otu0042 | <i>Bifidobacterium catenulatum</i> (98%)             | 2866      | 0.10                                              | 0.47                                               | 0.060        | No                                                       |
| Otu0043 | <i>Bacteroides ovatus</i> (99%)                      | 2809      | 0.30                                              | 0.59                                               | 0.028        | No                                                       |
| Otu0044 | Uncharacterised Ruminococcaceae                      | 2807      | 0.90                                              | 0.27                                               | 0.005        | Yes                                                      |
| Otu0045 | <i>Faecalibacterium prausnitzii</i> (97%)            | 2738      | 0.56                                              | 0.43                                               | 0.403        | No                                                       |
| Otu0046 | <i>Blautia</i> sp. (99%)                             | 2624      | 0.22                                              | 0.47                                               | 0.003        | Yes                                                      |
| Otu0047 | <i>Fusicatenibacter saccharivorans</i> (97%)         | 2502      | 0.20                                              | 0.53                                               | 0.001        | Yes                                                      |

|         |                                            |      |      |      |              |     |
|---------|--------------------------------------------|------|------|------|--------------|-----|
| Otu0048 | <i>Subdoligranulum</i> sp.                 | 2377 | 0.59 | 0.35 | 0.129        | No  |
| Otu0049 | <i>Alistipes onderdonkii</i>               | 2372 | 0.11 | 0.65 | 0.003        | Yes |
| Otu0051 | <i>Catenibacterium mitsuokai</i> (99%)     | 2286 | 0.91 | 0.00 | <b>0.001</b> | Yes |
| Otu0052 | <i>Sutterella massiliensis</i>             | 2221 | 0.90 | 0.10 | 0.008        | Yes |
| Otu0053 | Uncharacterised <i>Rikenellaceae</i>       | 2217 | 0.00 | 0.58 | 0.081        | No  |
| Otu0054 | <i>Sutterella</i> sp.                      | 2132 | 0.00 | 0.55 | <b>0.001</b> | Yes |
| Otu0058 | Uncharaterised <i>Bacteria</i>             | 2079 | 0.90 | 0.02 | <b>0.001</b> | Yes |
| Otu0059 | <i>Parabacteroides merdae</i>              | 2075 | 0.11 | 0.58 | 0.002        | Yes |
| Otu0060 | <i>Faecalibacterium prausnitzii</i> (98%)  | 2059 | 0.58 | 0.24 | 0.059        | No  |
| Otu0062 | <i>Eubacterium siraeum</i> (99%)           | 1962 | 0.06 | 0.53 | 0.070        | No  |
| Otu0063 | Uncharacterised <i>Clostridiales</i>       | 1959 | 0.07 | 0.51 | 0.066        | No  |
| Otu0067 | Uncharacterised <i>Erysipelotrichaceae</i> | 1914 | 0.72 | 0.19 | 0.199        | No  |
| Otu0072 | <i>Dialister invisus</i>                   | 1821 | 0.61 | 0.05 | 0.041        | No  |
| Otu0073 | <i>Phascolarctobacterium</i> sp. (99%)     | 1783 | 0.61 | 0.22 | 0.090        | No  |
| Otu0075 | <i>Prevotella copri</i> (97%)              | 1669 | 0.89 | 0.01 | 0.003        | Yes |
| Otu0079 | <i>Alistipes</i> spp.                      | 1565 | 0.55 | 0.16 | 0.166        | No  |
| Otu0092 | <i>Bacteroides</i> spp.                    | 1344 | 0.85 | 0.00 | <b>0.001</b> | Yes |
| Otu0100 | Uncharacterised <i>Bacteria</i>            | 1238 | 0.49 | 0.01 | 0.174        | No  |
| Otu0106 | Uncharacterised <i>Bacteroidetes</i>       | 1204 | 0.66 | 0.00 | 0.001        | Yes |
