# Supplementary material for: Relative abundance of the Prevotella genus within the human gut microbiota of elderly volunteers determines the inter-individual responses to dietary supplementation with wheat bran arabinoxylan-oligosaccharides
Source: PubMed Central journal article supplement (PMC7490872; doi:10.1186/s12866-020-01968-4), 2020-09-14
Supplement: 12866_2020_1968_MOESM4_ESM.pdf [file 12866_2020_1968_MOESM4_ESM.pdf]

**Additional file 4 Table S4A.** LEfSe analysis at the genus and family levels, between the different sample cohorts – AXOS, maltodextrin and washout period in the *Prevotella*-plus group, only include taxa >0.5 % of total proportional abundance. Cohorts in the supplement column indicate where taxa were associated with a particular supplement. Bacterial groups showing significant differences during the AXOS supplementation period were validated using the Wilcoxon test

| Genus level                      | pValue  | Supplement   | Family level                | pValue  | Supplement   |
|----------------------------------|---------|--------------|-----------------------------|---------|--------------|
| <i>Prevotella</i>                | 0.002   | AXOS         | Ruminococcaceae             |         | -            |
| <i>Bacteroides</i>               | 0.005   | maltodextrin | Prevotellaceae              | 0.002   | AXOS         |
| <i>Faecalibacterium</i>          |         | -            | Lachnospiraceae             |         | -            |
| Ruminococcaceae_unclassified     |         | -            | Bacteroidaceae              | 0.005   | maltodextrin |
| <i>Ruminococcus</i>              |         | -            | Enterobacteriaceae          |         | -            |
| Clostridiales_unclassified       |         | -            | Erysipelotrichaceae         |         | -            |
| <i>Escherichia/Shigella</i>      |         | -            | Clostridiales_unclassified  |         | -            |
| <i>Oscillibacter</i>             | 0.013   | maltodextrin | Porphyromonadaceae          |         | -            |
| <i>Bifidobacterium</i>           | <0.0001 | AXOS         | Bifidobacteriaceae          | <0.0001 | AXOS         |
| <i>Alistipes</i>                 |         | -            | Rikenellaceae               |         | -            |
| <i>Subdoligranulum</i>           |         | -            | Firmicutes_unclassified     |         | -            |
| <i>Roseburia</i>                 |         | -            | Peptostreptococcaceae       |         | -            |
| Firmicutes_unclassified          |         | -            | Veillonellaceae             |         | -            |
| <i>Blautia</i>                   |         | -            | Sutterellaceae              |         | -            |
| <i>Dialister</i>                 |         | -            | Coriobacteriaceae           |         | -            |
| Bacteria_unclassified            |         | -            | Bacteria_unclassified       |         | -            |
| <i>Barnesiella</i>               |         | -            | Clostridiaceae_1            |         | -            |
| Lachnospiraceae_unclassified     |         | -            | Acidaminococcaceae          |         | -            |
| <i>Catenibacterium</i>           |         | -            | Bacteroidetes_unclassified  |         | -            |
| <i>Sutterella</i>                |         | -            | Proteobacteria_unclassified | 0.033   | Washout      |
| <i>Collinsella</i>               |         | -            |                             |         |              |
| <i>Intestinibacter</i>           |         | -            |                             |         |              |
| <i>Clostridium_sensu_stricto</i> |         | -            |                             |         |              |
| <i>Turicibacter</i>              |         | -            |                             |         |              |
| <i>Dorea</i>                     |         | -            |                             |         |              |
| <i>Anaerostipes</i>              |         | -            |                             |         |              |
| <i>Holdemanella</i>              |         | -            |                             |         |              |
| <i>Coprococcus</i>               |         | -            |                             |         |              |
| <i>Fusicatenibacter</i>          |         | -            |                             |         |              |
| <i>Phascolarctobacterium</i>     |         | -            |                             |         |              |
| <i>Romboutsia</i>                |         | -            |                             |         |              |
| Bacteroidetes_unclassified       |         | -            |                             |         |              |
| <i>Ruminococcus2</i>             | 0.042   | maltodextrin |                             |         |              |
| Proteobacteria_unclassified      | 0.031   | Washout      |                             |         |              |
| <i>Ehallii</i>                   |         | -            |                             |         |              |
| <i>Parabacteroides</i>           |         | -            |                             |         |              |
| <i>Guyana</i>                    |         | -            |                             |         |              |

| Wilcoxon<br>signed-ranked<br>test | Genus             |       |       |                        |       |       | Family                |       |       |                           |       |       |
|-----------------------------------|-------------------|-------|-------|------------------------|-------|-------|-----------------------|-------|-------|---------------------------|-------|-------|
|                                   | <i>Prevotella</i> |       |       | <i>Bifidobacterium</i> |       |       | <i>Prevotellaceae</i> |       |       | <i>Bifidobacteriaceae</i> |       |       |
|                                   | Washout           | AXOS  | diff  | Washout                | AXOS  | diff  | Washout               | AXOS  | diff  | Washout                   | AXOS  | diff  |
| 1                                 | 28.03             | 31.21 | 3.18  | 0.56                   | 2.70  | 2.14  | 29.71                 | 33.32 | 3.62  | 0.56                      | 2.70  | 2.14  |
| 4                                 | 30.93             | 43.25 | 12.32 | 1.91                   | 5.45  | 3.54  | 32.03                 | 44.14 | 12.12 | 1.91                      | 5.45  | 3.54  |
| 6                                 | 12.02             | 33.58 | 21.56 | 2.21                   | 14.05 | 11.84 | 12.50                 | 33.71 | 21.21 | 2.21                      | 14.05 | 11.84 |
| 8                                 | 2.37              | 3.05  | 0.69  | 2.98                   | 1.53  | -1.45 | 2.37                  | 3.05  | 0.69  | 2.98                      | 1.53  | -1.45 |
| 9                                 | 8.10              | 21.54 | 13.44 | 2.04                   | 4.35  | 2.32  | 8.81                  | 22.00 | 13.19 | 2.04                      | 4.35  | 2.32  |
| 14                                | 2.72              | 7.43  | 4.71  | 0.00                   | 7.89  | 7.89  | 2.72                  | 7.43  | 4.71  | 0.00                      | 7.89  | 7.89  |
| 22                                | 17.41             | 36.20 | 18.79 | 0.59                   | 7.92  | 7.33  | 17.41                 | 36.20 | 18.79 | 0.59                      | 7.92  | 7.33  |
| 24                                | 13.42             | 33.53 | 20.11 | 1.48                   | 4.10  | 2.62  | 13.54                 | 33.58 | 20.04 | 1.48                      | 4.10  | 2.62  |
| Median                            |                   |       | 12.04 |                        |       | 4.78  |                       |       | 11.97 |                           |       | 4.78  |
| Wilcoxon Stats                    |                   |       | 36    |                        |       | 35    |                       |       | 36    |                           |       | 35    |
| P-value                           |                   |       | 0.014 |                        |       | 0.021 |                       |       | 0.014 |                           |       | 0.021 |

**Additional file 4 Table S4B.** LEfSe analysis at the genus and family levels, between the different sample cohorts – AXOS, maltodextrin and washout period in the *Prevotella*-minus group, only include taxa >0.5 % of total proportional abundance. Cohorts in the supplement column indicate where taxa were associated with a particular supplement. Bacterial groups showing significant differences during the AXOS supplementation period were validated using the Wilcoxon test

| Genus Level                      | pValue  | Supplement |
|----------------------------------|---------|------------|
| Bacteroides                      |         | -          |
| Faecalibacterium                 |         | -          |
| Bifidobacterium                  | <0.0001 | AXOS       |
| Ruminococcaceae_unclassified     |         | -          |
| Subdoligranulum                  |         | -          |
| Alistipes                        |         | -          |
| Clostridiales_unclassified       |         | -          |
| Ruminococcus                     |         | -          |
| Blautia                          |         | -          |
| Roseburia                        |         | -          |
| Guyana                           |         | -          |
| Firmicutes_unclassified          |         | -          |
| Oscillibacter                    |         | -          |
| Rikenella                        |         | -          |
| Streptococcus                    |         | -          |
| Lachnospiraceae_unclassified     |         | -          |
| Anaerostipes                     |         | -          |
| Collinsella                      |         | -          |
| Parabacteroides                  | 0.031   | Washout    |
| Fusicatenibacter                 |         | -          |
| Parasutterella                   |         | -          |
| Sutterella                       |         | -          |
| Ehallii                          |         | -          |
| Barnesiella                      |         | -          |
| Proteobacteria_unclassified      |         | -          |
| Dorea                            |         | -          |
| Clostridium_IV                   |         | -          |
| Alphaproteobacteria_unclassified |         | -          |
| Ruminococcus2                    |         | -          |
| Erysipelotrichaceae_unclassified |         | -          |
| Bacteroidetes_unclassified       |         | -          |
| Bacteroidales_unclassified       |         | -          |
| Clostridium_XIVa                 |         | -          |
| Phascolarctobacterium            |         | -          |

| Family level                     | pValue  | Supplement |
|----------------------------------|---------|------------|
| Ruminococcaceae                  |         | -          |
| Bacteroidaceae                   |         | -          |
| Lachnospiraceae                  |         | -          |
| Bifidobacteriaceae               | <0.0001 | AXOS       |
| Rikenellaceae                    |         | -          |
| Clostridiales_unclassified       |         | -          |
| Erysipelotrichaceae              |         | -          |
| Porphyromonadaceae               |         | -          |
| Sutterellaceae                   |         | -          |
| Coriobacteriaceae                |         | -          |
| Firmicutes_unclassified          |         | -          |
| Streptococcaceae                 |         | -          |
| Peptostreptococcaceae            |         | -          |
| Proteobacteria_unclassified      |         | -          |
| Alphaproteobacteria_unclassified |         | -          |
| Acidaminococcaceae               |         | -          |
| Bacteroidetes_unclassified       |         | -          |
| Bacteroidales_unclassified       |         | -          |
| Prevotellaceae                   |         | -          |

| Wilcoxon<br>signed-ranked<br>test | Genus<br><i>Bifidobacterium</i> spp. |       |       | Family<br>Bifidobacteriaceae |       |       |
|-----------------------------------|--------------------------------------|-------|-------|------------------------------|-------|-------|
|                                   | Washout                              | AXOS  | diff  | Washout                      | AXOS  | diff  |
| 2                                 | 3.46                                 | 21.64 | 18.18 | 3.46                         | 21.64 | 18.18 |
| 3                                 | 6.01                                 | 25.99 | 19.98 | 6.01                         | 25.99 | 19.98 |
| 5                                 | 1.83                                 | 13.39 | 11.56 | 1.83                         | 13.39 | 11.56 |
| 10                                | 1.43                                 | 18.05 | 16.62 | 1.43                         | 18.05 | 16.62 |
| 11                                | 0.79                                 | 13.95 | 13.16 | 0.79                         | 13.95 | 13.16 |
| 13                                | 0.03                                 | 0.28  | 0.25  | 0.03                         | 0.28  | 0.25  |
| 18                                | 8.45                                 | 9.37  | 0.92  | 8.45                         | 9.37  | 0.92  |
| 19                                | 7.41                                 | 11.69 | 4.28  | 7.41                         | 11.69 | 4.28  |
| 20                                | 11.20                                | 22.66 | 11.46 | 11.20                        | 22.66 | 11.46 |
| 21                                | 3.13                                 | 15.02 | 11.89 | 3.13                         | 15.02 | 11.89 |
| 23                                | 3.64                                 | 16.93 | 13.29 | 3.64                         | 16.93 | 13.29 |
| 25                                | 4.91                                 | 13.26 | 8.35  | 4.91                         | 13.26 | 8.35  |
| 26                                | 6.77                                 | 16.88 | 10.11 | 6.77                         | 16.88 | 10.11 |
| Median                            |                                      |       | 11.23 |                              |       | 11.23 |
| Wilcoxon Stats                    |                                      |       | 91    |                              |       | 91    |
| P-value                           |                                      |       | 0.002 |                              |       | 0.002 |
