# Supplementary material for: Relative abundance of the Prevotella genus within the human gut microbiota of elderly volunteers determines the inter-individual responses to dietary supplementation with wheat bran arabinoxylan-oligosaccharides
Source: PubMed Central journal article supplement (PMC7490872; doi:10.1186/s12866-020-01968-4), 2020-09-14
Supplement: 12866_2020_1968_MOESM5_ESM.pdf [file 12866_2020_1968_MOESM5_ESM.pdf]

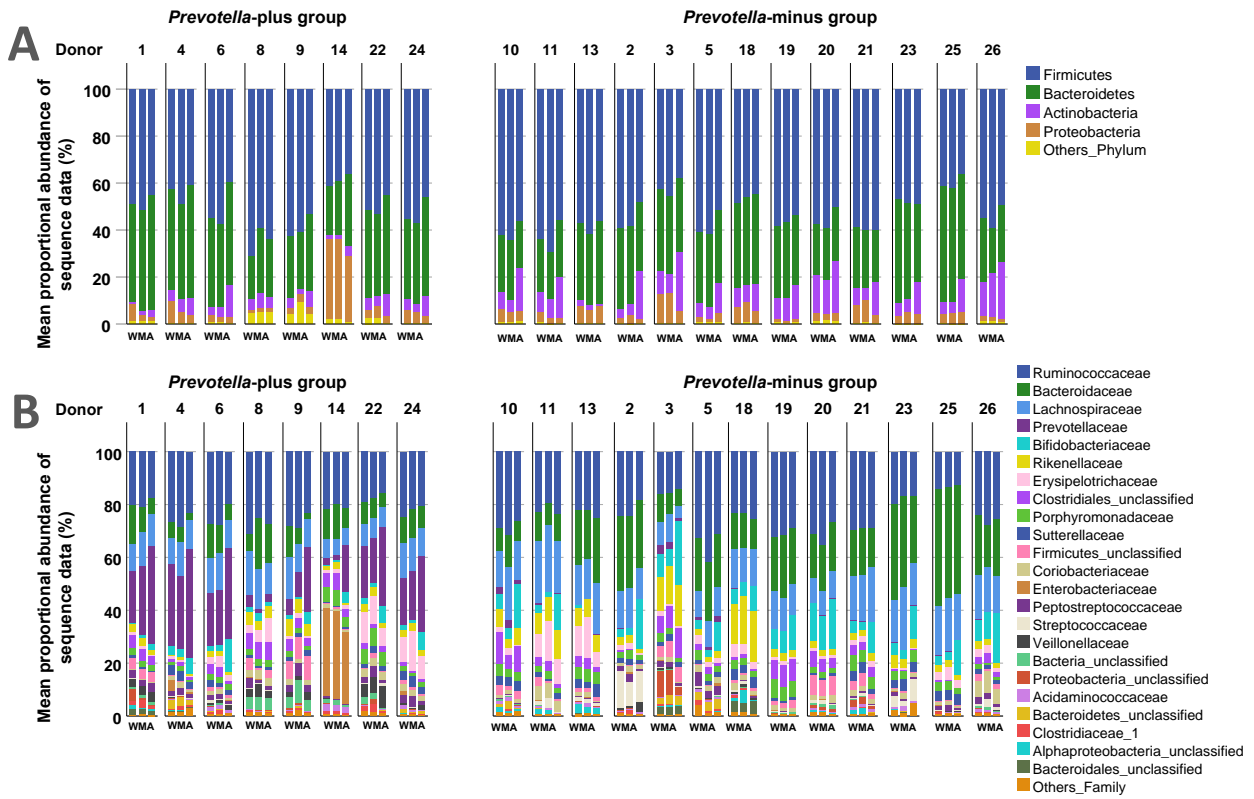

**Additional file 5: Figure S1.** Changes in average proportional abundance within individual volunteers at the bacterial (A) phylum and (B) family level based on Illumina MiSeq sequencing of 16S rRNA gene amplicons. W= washout period, M= Maltodextrin period, A= AXOS period.
