# Supplementary material for: Relative abundance of the Prevotella genus within the human gut microbiota of elderly volunteers determines the inter-individual responses to dietary supplementation with wheat bran arabinoxylan-oligosaccharides
Source: PubMed Central journal article supplement (PMC7490872; doi:10.1186/s12866-020-01968-4), 2020-09-14
Supplement: 12866_2020_1968_MOESM6_ESM.pdf [file 12866_2020_1968_MOESM6_ESM.pdf]

**Additional file 6: Table S5A** Metastats analysis of the most proportionally abundant operational taxonomic units (OTUs accounting for > 0.5 % of total proportional abundance between washout and AXOS supplement periods) for the *Prevotella*-plus volunteer group. P-values less than  $p < 0.001$  are shown in bold. P values were corrected using the Benjamini-Hochberg method (Benjamini, Hochberg 1995) to account for multiple comparisons.

| OTU     | <u>MegaBLAST Closest Match (Representative Seq.)</u> | No. of seq | Mean of Washout (%) | Mean of AXOS (%) | p-value      | Significant after applying Benjamini-Hochberg correction |
|---------|------------------------------------------------------|------------|---------------------|------------------|--------------|----------------------------------------------------------|
| Otu0002 | <i>Prevotella copri</i>                              | 21373      | 8.15                | 15.64            | 0.036        | No                                                       |
| Otu0012 | <i>Prevotella</i> spp.                               | 8193       | 2.99                | 6.49             | 0.022        | No                                                       |
| Otu0001 | <i>Bacteroides vulgatus</i> (99%)                    | 7311       | 3.80                | 2.01             | <b>0.001</b> | Yes                                                      |
| Otu0013 | <i>Escherichia coli</i>                              | 7060       | 3.64                | 2.76             | 0.678        | No                                                       |
| Otu0004 | <i>Faecalibacterium prausnitzii</i> (99%)            | 6238       | 3.08                | 2.84             | 0.645        | No                                                       |
| Otu0022 | <i>Prevotella ruminicola</i>                         | 5971       | 2.05                | 4.20             | 0.464        | No                                                       |
| Otu0005 | <i>Faecalibacterium prausnitzii</i>                  | 3748       | 1.87                | 1.46             | 0.315        | No                                                       |
| Otu0016 | <i>Barnesiella intestinihominis</i>                  | 3475       | 1.58                | 1.51             | 0.868        | No                                                       |
| Otu0006 | <i>Ruminococcus bicirculans</i> (99%)                | 3258       | 1.63                | 1.21             | 0.448        | No                                                       |
| Otu0003 | <i>Bacteroides uniformis</i>                         | 3110       | 1.59                | 0.98             | 0.404        | No                                                       |
| Otu0010 | <i>Faecalibacterium prausnitzii</i> (99%)            | 2841       | 1.30                | 1.60             | 0.502        | No                                                       |
| Otu0008 | <i>Faecalibacterium prausnitzii</i> (98%)            | 2525       | 1.16                | 1.23             | 0.825        | No                                                       |
| Otu0051 | <i>Catenibacterium mitsuokai</i> (99%)               | 2273       | 0.91                | 0.97             | 0.911        | No                                                       |
| Otu0018 | Uncharacterised <i>Ruminococcaceae</i>               | 2271       | 1.12                | 1.10             | 0.970        | No                                                       |
| Otu0017 | <i>Faecalibacterium prausnitzii</i>                  | 2223       | 1.03                | 1.08             | 0.832        | No                                                       |
| Otu0058 | Uncharacterised <i>Bacteria</i>                      | 1995       | 0.90                | 0.51             | 0.309        | No                                                       |
| Otu0037 | <i>Intestinibacter bartlettii</i> (98%)              | 1978       | 1.06                | 0.64             | 0.140        | No                                                       |
| Otu0009 | <i>Bacteroides dorei</i>                             | 1889       | 1.16                | 0.57             | 0.144        | No                                                       |
| Otu0052 | <i>Sutterella massiliensis</i>                       | 1808       | 0.90                | 0.63             | 0.478        | No                                                       |
| Otu0030 | <i>Ruminococcus bromii</i> (99%)                     | 1698       | 0.88                | 0.53             | 0.290        | No                                                       |
| Otu0028 | <i>Alistipes putredinis</i>                          | 1670       | 0.83                | 0.64             | 0.104        | No                                                       |
| Otu0044 | Uncharacterised <i>Ruminococcaceae</i>               | 1663       | 0.90                | 0.50             | 0.068        | No                                                       |
| Otu0075 | <i>Prevotella copri</i> (97%)                        | 1660       | 0.89                | 0.58             | 0.485        | No                                                       |
| Otu0072 | <i>Dialister invisus</i>                             | 1621       | 0.61                | 1.04             | 0.392        | No                                                       |
| Otu0032 | <i>Romboutsia timonensis</i> (99%)                   | 1601       | 0.74                | 0.67             | 0.694        | No                                                       |
| Otu0014 | <i>Bifidobacterium adolescentis</i>                  | 1555       | 0.44                | 1.58             | 0.037        | No                                                       |
| Otu0021 | <i>Eubacterium rectale</i>                           | 1532       | 0.69                | 0.76             | 0.798        | No                                                       |
| Otu0035 | <i>Roseburia faecis</i>                              | 1470       | 0.57                | 0.97             | 0.144        | No                                                       |
| Otu0025 | <i>Collinsella aerofaciens</i>                       | 1437       | 0.71                | 0.62             | 0.665        | No                                                       |
| Otu0015 | <i>Anaerostipes hadrus</i>                           | 1407       | 0.58                | 0.77             | 0.496        | No                                                       |
| Otu0092 | <i>Bacteroides</i> spp.                              | 1344       | 0.85                | 0.44             | 0.484        | No                                                       |
| Otu0067 | Uncharacterised <i>Erysipelotrichaceae</i>           | 1329       | 0.72                | 0.41             | 0.502        | No                                                       |
| Otu0100 | Uncharacterised <i>Bacteria</i>                      | 1223       | 0.49                | 0.89             | 0.568        | No                                                       |
| Otu0106 | Uncharacterised <i>Bacteroidetes</i>                 | 1203       | 0.66                | 0.46             | 0.566        | No                                                       |
| Otu0045 | <i>Faecalibacterium prausnitzii</i> (97%)            | 1176       | 0.56                | 0.55             | 0.941        | No                                                       |
| Otu0060 | <i>Faecalibacterium prausnitzii</i> (98%)            | 1170       | 0.58                | 0.58             | 0.988        | No                                                       |
| Otu0011 | <i>Bifidobacterium longum</i>                        | 1151       | 0.36                | 0.93             | 0.007        | No                                                       |
| Otu0073 | <i>Phascolarctobacterium</i> sp. (99%)               | 1126       | 0.61                | 0.44             | 0.592        | No                                                       |
| Otu0007 | <i>Guyana massiliensis</i>                           | 1118       | 0.54                | 0.31             | 0.067        | No                                                       |
| Otu0079 | <i>Alistipes</i> spp.                                | 1098       | 0.55                | 0.41             | 0.695        | No                                                       |
| Otu0048 | <i>Subdoligranulum</i> sp.                           | 1096       | 0.59                | 0.48             | 0.602        | No                                                       |

**Additional file 6: Table S5B** Metastats analysis of the most proportionally abundant operational taxonomic units (OTUs accounting for > 0.5 % of total proportional abundance between washout and AXOS supplement periods) for the *Prevotella*-minus group. P-values less than  $p < 0.001$  are shown in bold. P values were corrected using the Benjamini-Hochberg method (Benjamini, Hochberg 1995) to account for multiple comparisons.

| OTU     | <u>MegaBLAST Closest Match (Representative Seq.)</u> | No. of seq | Mean of Washout (%) | Mean of AXOS (%) | p-value      | Significant after applying Benjamini-Hochberg correction |
|---------|------------------------------------------------------|------------|---------------------|------------------|--------------|----------------------------------------------------------|
| Otu0001 | <i>Bacteroides vulgatus</i> (99%)                    | 19767      | 5.66                | 5.27             | 0.797        | No                                                       |
| Otu0003 | <i>Bacteroides uniformis</i>                         | 16905      | 4.97                | 4.36             | 0.486        | No                                                       |
| Otu0004 | <i>Faecalibacterium prausnitzii</i> (99%)            | 12018      | 3.59                | 3.13             | 0.433        | No                                                       |
| Otu0007 | <i>Guyana massiliensis</i>                           | 7764       | 2.01                | 1.61             | 0.584        | No                                                       |
| Otu0005 | <i>Faecalibacterium prausnitzii</i>                  | 7179       | 1.86                | 2.25             | 0.289        | No                                                       |
| Otu0011 | <i>Bifidobacterium longum</i>                        | 7174       | 1.55                | 3.14             | <b>0.001</b> | Yes                                                      |
| Otu0006 | <i>Ruminococcus bicirculans</i> (99%)                | 6719       | 1.79                | 2.01             | 0.714        | No                                                       |
| Otu0009 | <i>Bacteroides dorei</i>                             | 6568       | 1.90                | 1.74             | 0.807        | No                                                       |
| Otu0008 | <i>Faecalibacterium prausnitzii</i> (98%)            | 6325       | 1.75                | 1.72             | 0.948        | No                                                       |
| Otu0014 | <i>Bifidobacterium adolescentis</i>                  | 5787       | 1.16                | 3.13             | 0.003        | No                                                       |
| Otu0020 | <i>Bacteroides cellulosilyticus</i>                  | 5757       | 1.69                | 1.37             | 0.488        | No                                                       |
| Otu0019 | <i>Streptococcus salivarius</i>                      | 5715       | 1.65                | 1.61             | 0.953        | No                                                       |
| Otu0010 | <i>Faecalibacterium prausnitzii</i> (99%)            | 5579       | 1.33                | 1.90             | 0.230        | No                                                       |
| Otu0015 | <i>Anaerostipes hadrus</i>                           | 5278       | 1.47                | 1.36             | 0.758        | No                                                       |
| Otu0024 | Uncharacterised <i>Rikenellaceae</i>                 | 4799       | 1.18                | 1.56             | 0.756        | No                                                       |
| Otu0021 | <i>Eubacterium rectale</i>                           | 4502       | 1.09                | 1.70             | 0.188        | No                                                       |
| Otu0017 | <i>Faecalibacterium prausnitzii</i>                  | 4372       | 1.21                | 1.23             | 0.935        | No                                                       |
| Otu0018 | Uncharacterised <i>Ruminococcaceae</i>               | 4329       | 1.18                | 1.03             | 0.839        | No                                                       |
| Otu0023 | <i>Subdoligranulum</i> sp. (97%)                     | 4055       | 1.19                | 0.99             | 0.485        | No                                                       |
| Otu0026 | <i>Bacteroides massiliensis</i>                      | 3768       | 1.14                | 0.62             | 0.241        | No                                                       |
| Otu0029 | <i>Bacteroides stercoris</i> (99%)                   | 3477       | 1.02                | 1.01             | 0.986        | No                                                       |
| Otu0016 | <i>Barnesiella intestinihominis</i>                  | 3168       | 0.92                | 0.83             | 0.688        | No                                                       |
| Otu0027 | <i>Sutterella wadsworthensis</i>                     | 3116       | 0.95                | 0.86             | 0.841        | No                                                       |
| Otu0038 | Uncharacterised <i>Firmicutes</i>                    | 2952       | 0.87                | 0.93             | 0.852        | No                                                       |
| Otu0031 | <i>Bifidobacterium faecale/adolescentis</i>          | 2938       | 0.53                | 1.63             | 0.004        | No                                                       |
| Otu0040 | Uncharacterised <i>Rikenellaceae</i>                 | 2912       | 0.74                | 0.91             | 0.887        | No                                                       |
| Otu0033 | Uncharacterised <i>Alphaproteobacteria</i>           | 2662       | 0.91                | 0.32             | 0.532        | No                                                       |
| Otu0034 | <i>Collinsella aerofaciens</i>                       | 2634       | 0.72                | 0.69             | 0.896        | No                                                       |
| Otu0025 | <i>Collinsella aerofaciens</i>                       | 2578       | 0.73                | 0.63             | 0.589        | No                                                       |
| Otu0042 | <i>Bifidobacterium catenulatum</i> (98%)             | 2552       | 0.47                | 1.45             | 0.183        | No                                                       |
| Otu0036 | <i>Blautia</i> sp. (99%)                             | 2527       | 0.66                | 0.78             | 0.342        | No                                                       |
| Otu0039 | <i>Bacteroides eggerthii</i> (99%)                   | 2514       | 0.63                | 0.82             | 0.610        | No                                                       |
| Otu0041 | <i>Bifidobacterium pseudocatenulatum</i>             | 2449       | 0.51                | 1.09             | 0.326        | No                                                       |
| Otu0028 | <i>Alistipes putredinis</i>                          | 2406       | 0.72                | 0.60             | 0.266        | No                                                       |
| Otu0053 | Uncharacterised <i>Rikenellaceae</i>                 | 2215       | 0.58                | 0.77             | 0.779        | No                                                       |
| Otu0043 | <i>Bacteroides ovatus</i> (99%)                      | 2135       | 0.59                | 0.75             | 0.448        | No                                                       |
| Otu0054 | <i>Sutterella</i> sp.                                | 2126       | 0.55                | 0.77             | 0.504        | No                                                       |
| Otu0047 | <i>Fusicatenibacter saccharivorans</i> (97%)         | 2122       | 0.53                | 0.69             | 0.380        | No                                                       |
| Otu0030 | <i>Ruminococcus bromii</i> (99%)                     | 2121       | 0.70                | 0.37             | 0.088        | No                                                       |
| Otu0049 | <i>Alistipes onderdonkii</i>                         | 2069       | 0.65                | 0.60             | 0.877        | No                                                       |
| Otu0046 | <i>Blautia</i> sp. (99%)                             | 2020       | 0.47                | 0.66             | 0.205        | No                                                       |
| Otu0063 | Uncharacterised <i>Clostridiales</i>                 | 1864       | 0.51                | 0.60             | 0.803        | No                                                       |
| Otu0059 | <i>Parabacteroides merdae</i>                        | 1838       | 0.58                | 0.50             | 0.655        | No                                                       |
| Otu0062 | <i>Eubacterium siraeum</i> (99%)                     | 1803       | 0.53                | 0.52             | 0.969        | No                                                       |
| Otu0032 | <i>Romboutsia timonensis</i> (99%)                   | 1793       | 0.57                | 0.31             | 0.052        | No                                                       |
