# Supplementary material for: Relative abundance of the Prevotella genus within the human gut microbiota of elderly volunteers determines the inter-individual responses to dietary supplementation with wheat bran arabinoxylan-oligosaccharides
Source: PubMed Central journal article supplement (PMC7490872; doi:10.1186/s12866-020-01968-4), 2020-09-14
Supplement: 12866_2020_1968_MOESM7_ESM.pdf [file 12866_2020_1968_MOESM7_ESM.pdf]

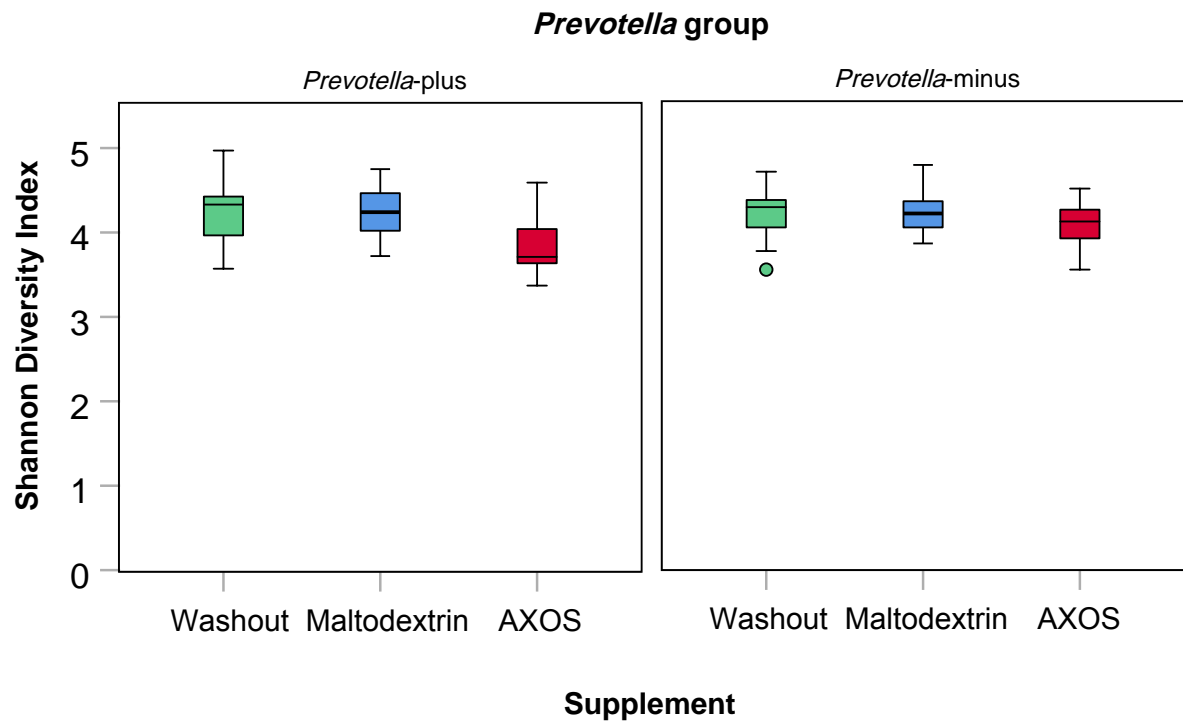

**Additional file 7: Figure S2.** Mean bacterial diversity across all volunteers for each dietary supplementary period for the *Prevotella*-plus and *Prevotella*-minus groups. There was significance different during the AXOS supplementation period (compared with washout period) for the *Prevotella*-plus group of volunteers (Wilcoxon  $p < 0.04$ ).
