# Supplementary material for: Relative abundance of the Prevotella genus within the human gut microbiota of elderly volunteers determines the inter-individual responses to dietary supplementation with wheat bran arabinoxylan-oligosaccharides
Source: PubMed Central journal article supplement (PMC7490872; doi:10.1186/s12866-020-01968-4), 2020-09-14
Supplement: 12866_2020_1968_MOESM8_ESM.pdf [file 12866_2020_1968_MOESM8_ESM.pdf]

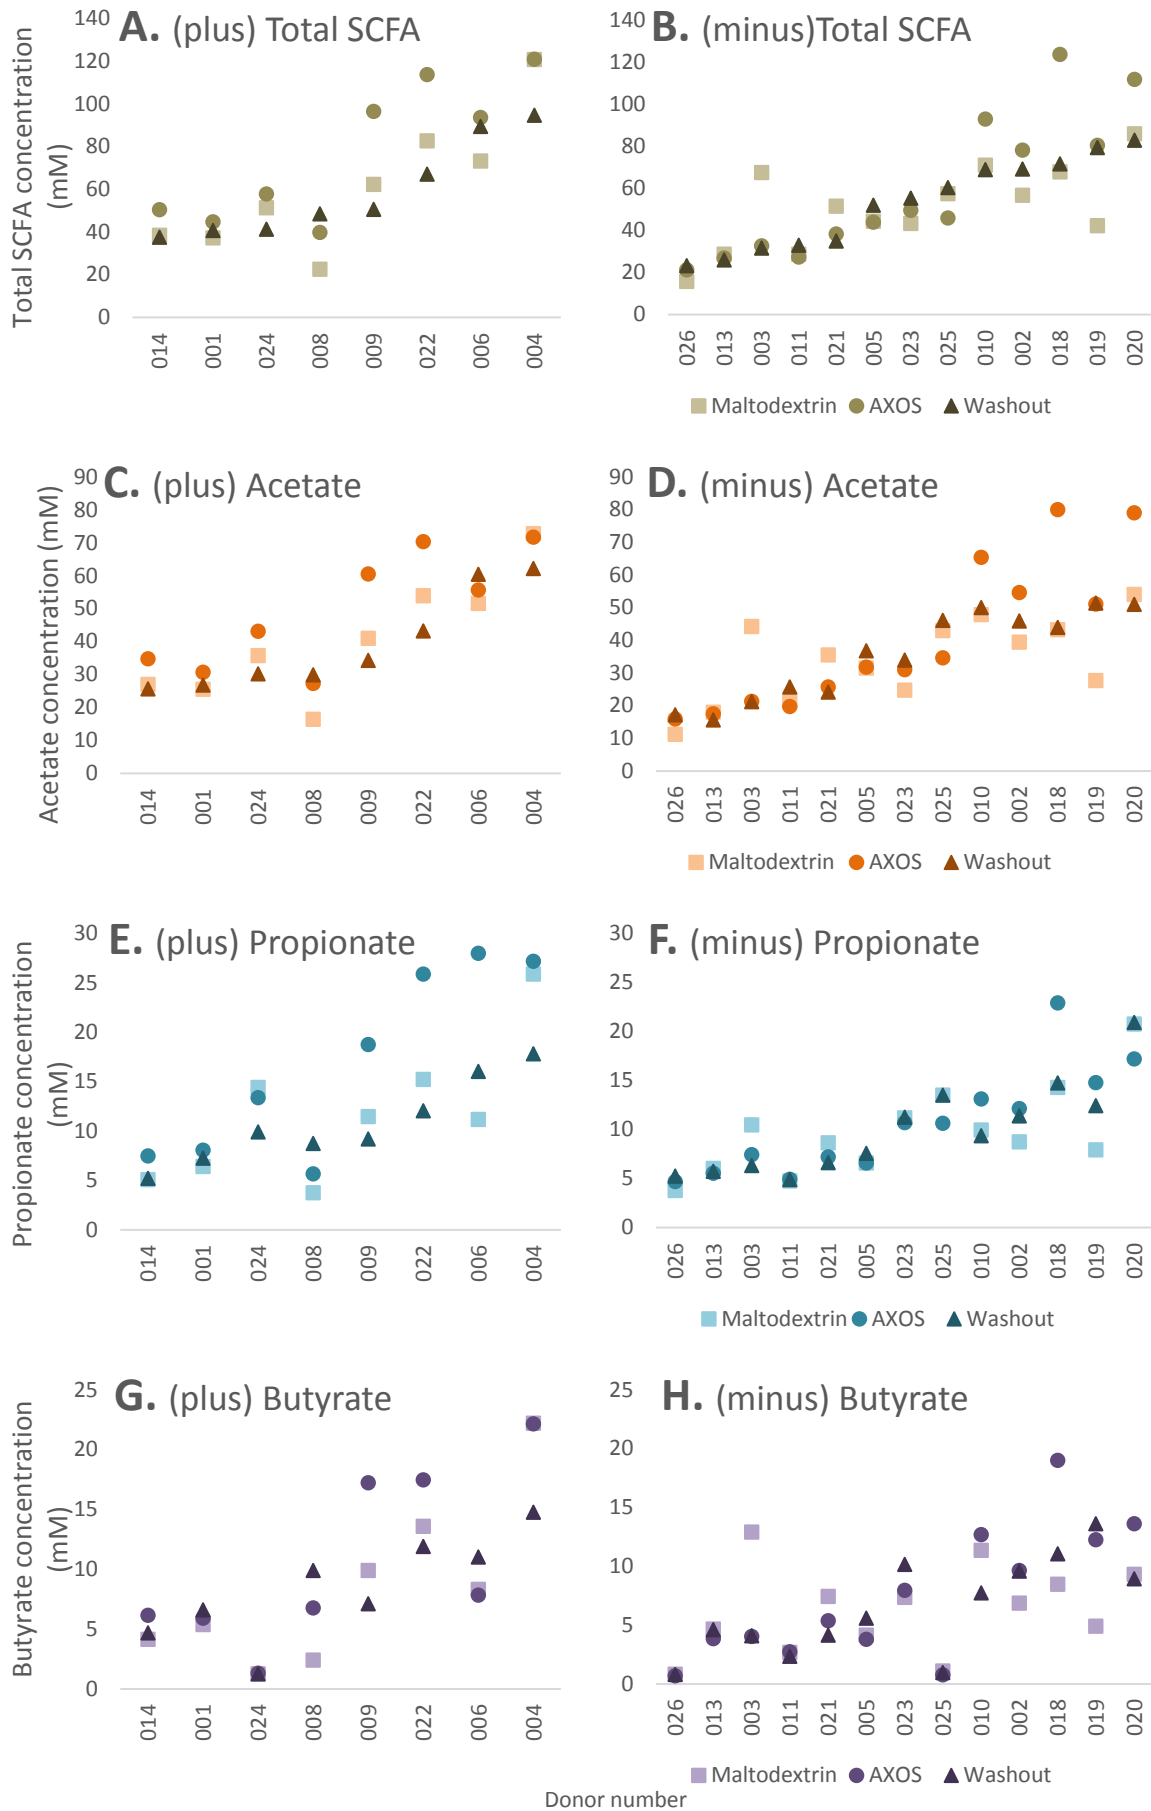

**Additional file 8: Figure S3.** Concentration of short chain fatty acids in faecal samples from the washout, maltodextrin and AXOS periods for both the *Prevotella*- plus and *Prevotella*- minus group, showing (A, B) total SCFA, (C, D) acetate, (E, F) propionate and (G, H) butyrate.
