# Supplementary material for: Relative abundance of the Prevotella genus within the human gut microbiota of elderly volunteers determines the inter-individual responses to dietary supplementation with wheat bran arabinoxylan-oligosaccharides
Source: PubMed Central journal article supplement (PMC7490872; doi:10.1186/s12866-020-01968-4), 2020-09-14
Supplement: 12866_2020_1968_MOESM9_ESM.pdf [file 12866_2020_1968_MOESM9_ESM.pdf]

### A. *Prevotella*- plus group

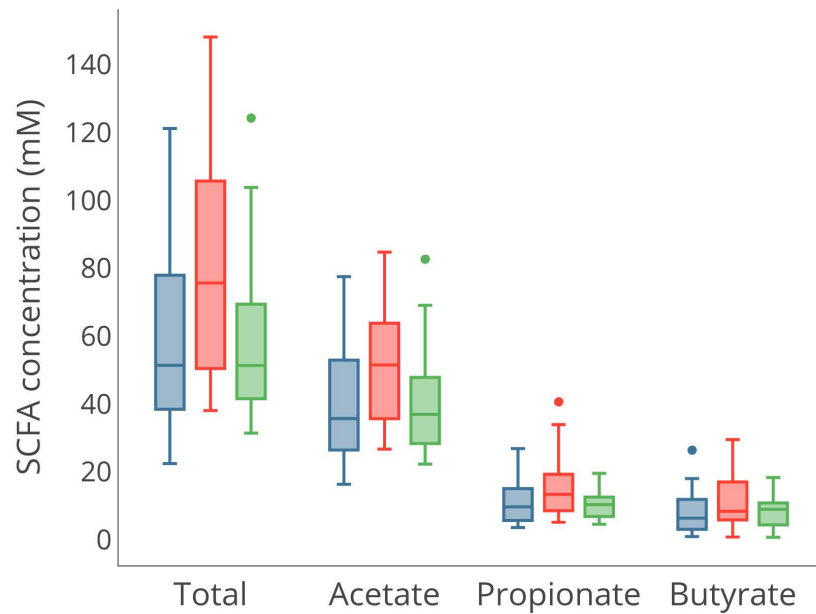

### B. *Prevotella*- minus group

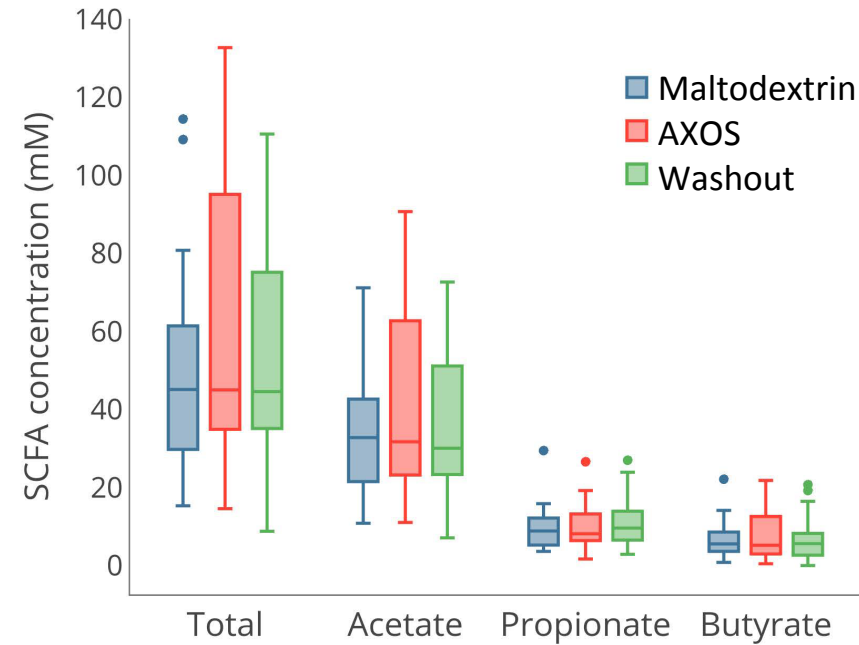

### C. *Prevotella*- plus group

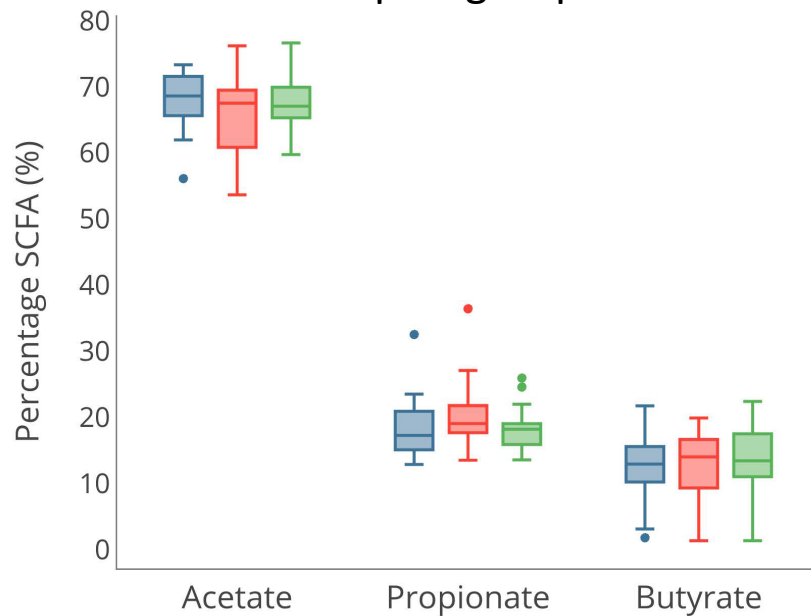

### D. *Prevotella*- minus group

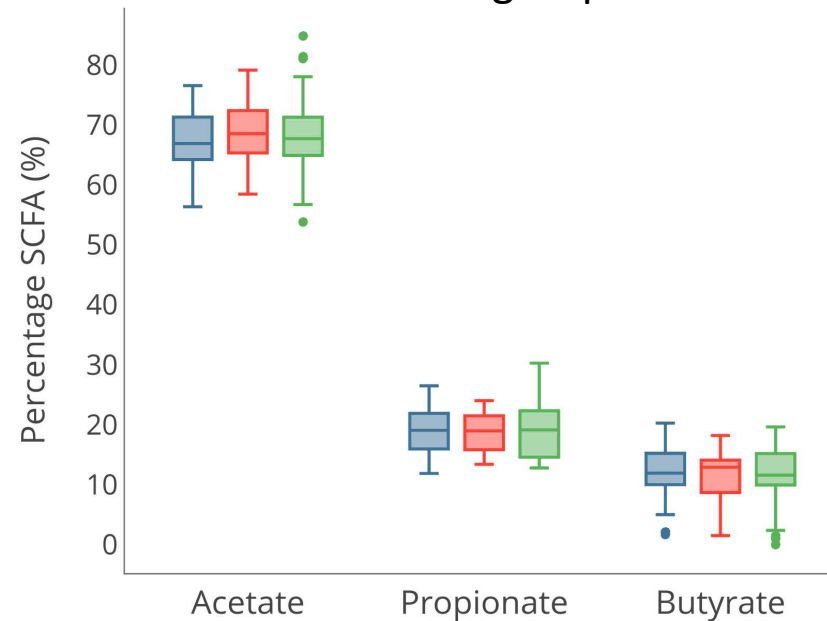

**Add file 9: Fig S4.** Mean acetate, propionate and butyrate concentrations (mM) measured from faecal samples in the combined washout, AXOS supplement and maltodextrin supplementation period for the (A) *Prevotella*-plus group, (B) *Prevotella*-minus group and percentage SCFA for the (C) *Prevotella*-plus group, and (D) *Prevotella*-minus group.
