# Supplementary material for: Relative abundance of the Prevotella genus within the human gut microbiota of elderly volunteers determines the inter-individual responses to dietary supplementation with wheat bran arabinoxylan-oligosaccharides
Source: PubMed Central journal article supplement (PMC7490872; doi:10.1186/s12866-020-01968-4), 2020-09-14
Supplement: 12866_2020_1968_MOESM11_ESM.pdf [file 12866_2020_1968_MOESM11_ESM.pdf]

## A. *Prevotella*-plus group

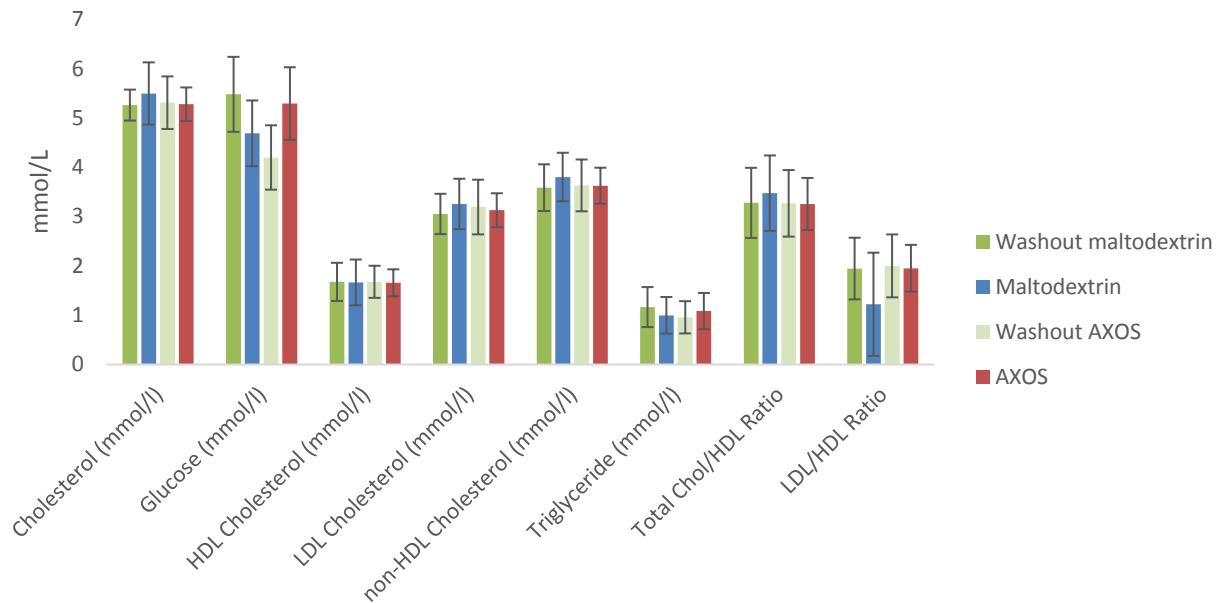

## B. *Prevotella*-minus group

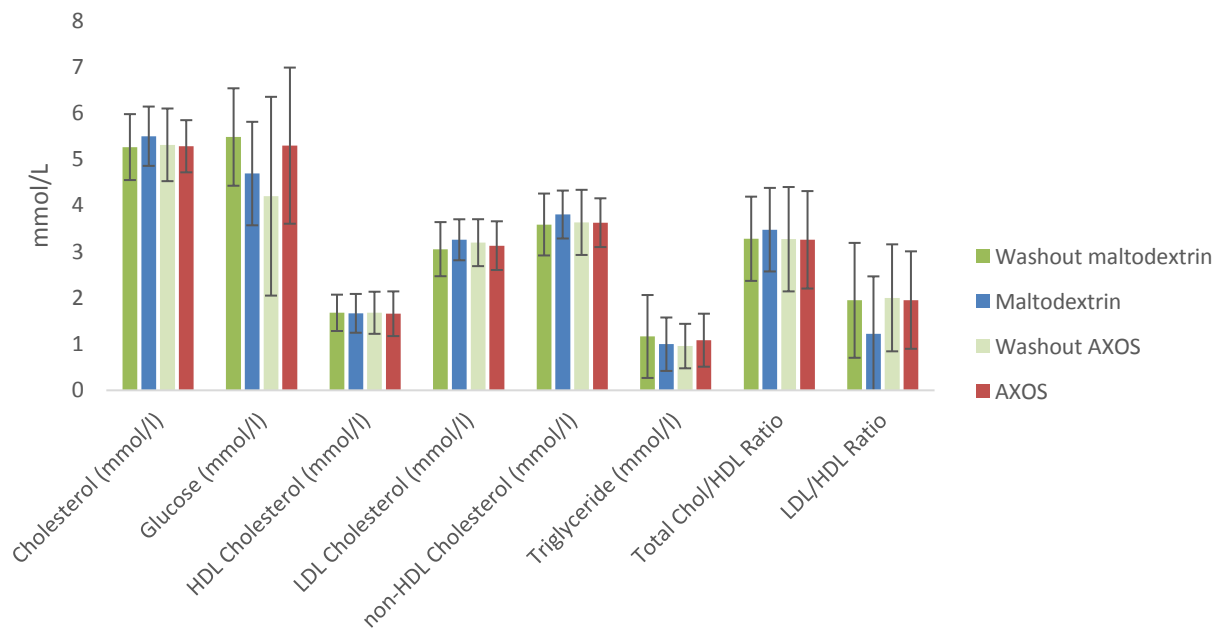

**Additional file 11: Figure S6.** Mean blood sample measurements across volunteers during the washout, maltodextrin and AXOS supplementation periods with the corresponding cholesterol, glucose, HDL cholesterol, LDL cholesterol, non-HDL cholesterol, triglyceride, total cholesterol/HDL ratio and LDL/HDL ratio, within the (A) *Prevotella*-plus and (B) *Prevotella*-minus groups.
